# Supplementary material for: Independent Predictive Value of Elevated YKL-40 in Ischemic Stroke Prognosis: Findings from a Nationwide Stroke Registry
Source: PubMed Central journal article supplement — Cerebrovasc Dis. 2023 Jan 30;52(4):460–70. doi: 10.1159/000527519 (PMC10568595; doi:10.1159/000527519), 2023-01-30
Supplement: ced-0052-0460-s01.pdf [file ced-0052-0460-s01.pdf]

## **Supplementary Material**

**Suppl. Table 1. Baseline characteristics of patients with or without YKL-40**

**Suppl. Table 2. 12-month death rates in patients with different types of ischemic stroke categorized by plasma YKL-40 percentiles**

**Suppl. Table 3. 12-month mRS 3-6 in patients with different types of ischemic stroke categorized by plasma YKL-40 percentiles**

**Suppl. Table 4. Unadjusted and adjusted hazard ratios of death in patients categorized by plasma YKL-40 quartile**

**Suppl. Table 5. Unadjusted and adjusted odds ratios of mRS 3-6 in patients categorized by plasma YKL-40 quartile**

**Suppl. Fig. 1. Subgroup analysis of death at 12m by plasma YKL-40 quartile categories.**

**Suppl. Fig. 2. Subgroup analysis of MRS 3-6 at 12m by plasma YKL-40 quartile categories.**

**Suppl. Table 1. Baseline characteristics of patients with or without YKL-40**

|                                             | Total           | With            | Without        | <i>P</i> value |
|---------------------------------------------|-----------------|-----------------|----------------|----------------|
| <b>Age (yr) , n( mean±SD)</b>               | 8138(61.7±11.6) | 8006(61.7±11.5) | 132(61.8±12.1) | 0.7932         |
| <b>Female, n(%)</b>                         | 2548(31.3%)     | 2506(31.3%)     | 42(31.8%)      | 0.9247         |
| <b>Health Insurance, n(%)</b>               | 7560(92.9%)     | 7437(92.9%)     | 123(93.2%)     | 1.0000         |
| <b>Smoking, n(%)</b>                        | 2725(33.5%)     | 2682(33.5%)     | 43 (32.6%)     | 0.8531         |
| <b>Alcohol, n(%)</b>                        | 1245(15.3%)     | 1231(15.4%)     | 14(10.6%)      | 0.1440         |
| <b>BMI (Kg/m<sup>2</sup>) , n( mean±SD)</b> | 8138(24.7±3.3)  | 8006(24.7±3.3)  | 132(24.8±2.9)  | 0.7062         |
| <b>Prior disease history, n(%)</b>          |                 |                 |                |                |
| <b>Hypertension</b>                         | 4831(59.4%)     | 4737(59.2%)     | 94(71.2%)      | 0.0054         |
| <b>Diabetes Mellitus</b>                    | 1823(22.4%)     | 1798(22.5%)     | 25(18.9%)      | 0.3996         |
| <b>Hyperlipidemia</b>                       | 583(7.2%)       | 573(7.2%)       | 10(7.6%)       | 0.8641         |
| <b>TIA</b>                                  | 189(2.3%)       | 183(2.3%)       | 6(4.6%)        | 0.1304         |
| <b>Cardiovascular diseases</b>              | 1289(15.8%)     | 1267(15.8%)     | 22(16.7%)      | 0.8098         |
| <b>Medication during hospital, n(%)</b>     |                 |                 |                |                |

|                                                           |                     |                     |                     |        |
|-----------------------------------------------------------|---------------------|---------------------|---------------------|--------|
| <b>Antithrombotics</b>                                    | 7965(98.7%)         | 7836(98.7%)         | 129 (98.5%)         | 0.6887 |
| <b>Antihypertensive medicines</b>                         | 3678(45.6%)         | 3621(45.6%)         | 57(43.5%)           | 0.6591 |
| <b>Diabetes medicines</b>                                 | 2053(25.4%)         | 2018(25.4%)         | 35(26.7%)           | 0.7616 |
| <b>Lipid-lowering medicines</b>                           | 7831(97.0%)         | 7701(97.0%)         | 130(99.2%)          | 0.1892 |
| <b>BWC (<math>\times 10^9/L</math>) *, n(median, IQR)</b> | 8026(7.7, 5.7-8.5)  | 7894(6.9, 5.7-8.5)  | 132(7.1, 5.9-8.8)   | 0.2477 |
| <b>Blood glucose, n( mean<math>\pm</math>SD)</b>          | 6448(5.6, 4.9-7.0)  | 6343(5.6, 4.9-7.0)  | 105(5.6, 5.0-7.2)   | 0.5837 |
| <b>Blood lipid, n( mean<math>\pm</math>SD)</b>            |                     |                     |                     |        |
| <b>TG</b>                                                 | 8086(1.6 $\pm$ 1.0) | 7959(1.6 $\pm$ 1.0) | 127 (1.7 $\pm$ 0.9) | 0.3171 |
| <b>CHO</b>                                                | 8090(4.2 $\pm$ 1.2) | 7963(4.2 $\pm$ 1.2) | 127(4.4 $\pm$ 1.1)  | 0.0186 |
| <b>HDL</b>                                                | 8083(1.1 $\pm$ 0.5) | 7956(1.1 $\pm$ 0.5) | 127(1.1 $\pm$ 0.3)  | 0.4966 |
| <b>LDL</b>                                                | 8084(2.5 $\pm$ 1.1) | 7957(2.5 $\pm$ 1.1) | 127(2.6 $\pm$ 0.9)  | 0.0934 |
| <b>APOA1</b>                                              | 4301(1.2 $\pm$ 0.4) | 4234(1.2 $\pm$ 0.4) | 67(1.3 $\pm$ 0.3)   | 0.1077 |
| <b>APOB</b>                                               | 5025(1.0 $\pm$ 1.1) | 4947(1.0 $\pm$ 1.1) | 78(1.0 $\pm$ 0.2)   | 0.0160 |
| <b>CRP, mg/L*, n(median, IQR)</b>                         | 7857(1.8,0.8-4.6)   | 7755(1.8,0.8-4.6)   | 102 (2.1,0.7-4.8)   | 0.7989 |
| <b>NIHSS at admission*, n(median, IQR)</b>                | 8138(3.0,2.0-6.0)   | 8006(3.0,2.0-6.0)   | 132(3.0,2.0-6.0)    | 0.6620 |
| <b>In-hospital complications, n(%)</b>                    |                     |                     |                     |        |

|                                |            |           |         |        |
|--------------------------------|------------|-----------|---------|--------|
| <b>Respiratory disease</b>     | 434(5.3%)  | 425(5.3%) | 9(6.8%) | 0.4312 |
| <b>liver disease</b>           | 576(7.1%)  | 569(7.1%) | 7(5.3%) | 0.6055 |
| <b>Urinary system diseases</b> | 213 (2.6%) | 208(2.6%) | 5(3.8%) | 0.3988 |
| <b>bleeding</b>                | 130(1.6%)  | 128(1.6%) | 2(1.5%) | 1.0000 |

Abbreviation: APOA1, apolipoprotein A1; APOB, apolipoprotein B; BMI, body mass index; BWC, Blood white cell; CHO, cholesterol; CRP, C-reactive protein; HDL, high density lipoprotein; IQR, interquartile range; LDL, low density lipoprotein; SD, standard deviation; TG, triglyceride.

\* Non-normal distribution variables.

**Suppl. Table 2. 12-month death rates in patients with different types of ischemic stroke categorized by plasma YKL-40 percentiles**

| subtype                            | N    | Plasma YKL-40 Percentile Categories |          |          |           |
|------------------------------------|------|-------------------------------------|----------|----------|-----------|
|                                    |      | 0-33%                               | 34-66%   | 67-90%   | 91-100%   |
| All, n(%)                          | 8006 | 23(0.9%)                            | 59(2.2%) | 84(4.4%) | 75(9.4%)  |
| large artery atherosclerosis, n(%) | 1995 | 8(1.3%)                             | 17(2.4%) | 21(4.4%) | 15(8.1%)  |
| cardiogenic embolism, n(%)         | 519  | 0                                   | 6(4.0%)  | 14(8.4%) | 14(14.9%) |
| small artery occlusion, n(%)       | 1803 | 1(0.2%)                             | 6(1.0%)  | 4(1.1%)  | 5(3.6%)   |
| another determined cause, n(%)     | 91   | 0                                   | 0        | 1(4.8%)  | 3(17.7%)  |
| undetermined cause , n(%)          | 3598 | 14(1.2%)                            | 30(2.6%) | 44(4.9%) | 38(10.4%) |

**Suppl. Table 3. 12-month mRS 3-6 in patients with different types of ischemic stroke categorized by plasma YKL-40 percentiles**

| subtype                            | N    | Plasma YKL-40 Percentile Categories |            |            |            |
|------------------------------------|------|-------------------------------------|------------|------------|------------|
|                                    |      | 0-33%                               | 34-66%     | 67-90%     | 91-100%    |
| All, n(%)                          | 7807 | 174(6.8%)                           | 271(10.5%) | 293(15.7%) | 187(24.0%) |
| large artery atherosclerosis, n(%) | 1925 | 70(11.7%)                           | 97(13.9%)  | 84(18.6%)  | 44(24.4%)  |
| cardiogenic embolism, n(%)         | 503  | 9(8.9%)                             | 19(12.8%)  | 32(20.1%)  | 31(33.0%)  |
| small artery occlusion, n(%)       | 1771 | 13(1.9%)                            | 31(5.1%)   | 24(6.7%)   | 13(9.9%)   |
| another determined cause, n(%)     | 90   | 1(3.1%)                             | 2(10.0%)   | 4(19.1%)   | 6(35.3%)   |
| undetermined cause , n(%)          | 3518 | 81(6.9%)                            | 122(10.9%) | 149(17.0%) | 93(26.2%)  |

**Suppl. Table 4. Unadjusted and adjusted hazard ratios of death in patients categorized by plasma YKL-40 quartile**

|         | 3m                  |                   |                  | 6m                  |                  |                 | 12m                 |                  |                 |
|---------|---------------------|-------------------|------------------|---------------------|------------------|-----------------|---------------------|------------------|-----------------|
|         | No. of patients (%) | HR (unadjusted)   | HR (Adjusted*)   | No. of patients (%) | HR (unadjusted)  | HR (Adjusted*)  | No. of patients (%) | HR (unadjusted)  | HR (Adjusted*)  |
| 0-25%   | 10 (0.5)            | Reference         |                  | 11 (0.5)            | Reference        |                 | 19(1.0)             | Reference        |                 |
| 26-50%  | 19 (1.0)            | 1.91 (0.89-4.10)  | 1.28 (0.56-2.94) | 30 (1.5)            | 2.74 (1.31-5.46) | 1.95(0.94-4.06) | 36(1.8)             | 1.90(1.09-3.31)  | 1.31(0.73-2.34) |
| 51-75%  | 21 (1.1)            | 2.10 (0.99-4.47)  | 1.03 (0.45-2.34) | 33 (1.7)            | 3.01 (1.52-5.95) | 1.46(0.70-3.04) | 52(2.6)             | 2.75(1.63-4.66)  | 1.35(0.78-2.36) |
| 76-100% | 67 (3.4)            | 6.82 (3.51-13.25) | 1.78 (0.82-3.86) | 94 (4.7)            | 8.75 (4.68-16.3) | 2.40(1.19-4.85) | 134(6.7)            | 7.28(4.50-11.77) | 2.15(1.27-3.66) |

Abbreviation: HR, hazard ratios.

\*adjusted for: age, sex, smoking, drinking, hypertension, diabetes mellitus, low density lipoprotein, C-reactive protein, national institutes of health stroke scale, medicine at discharge (antiplatelet, Anticoagulant, lipid-lowering, hypoglycemic, antihypertensive medicines), complications (respiratory, liver, urinary and bleeding diseases)

**Suppl. Table 5. Unadjusted and adjusted odds ratios of mRS 3-6 in patients categorized by plasma YKL-40 quartile**

|         | 3m                  |                 |                 | 6m                  |                  |                 | 12m                 |                  |                 |
|---------|---------------------|-----------------|-----------------|---------------------|------------------|-----------------|---------------------|------------------|-----------------|
|         | No. of patients (%) | OR (unadjusted) | OR (Adjusted*)  | No. of patients (%) | OR (unadjusted)  | OR (Adjusted*)  | No. of patients (%) | OR (unadjusted)  | OR (Adjusted*)  |
| 0-25%   | 163(8.2)            | Reference       |                 | 138 (7.0)           | Reference        |                 | 127(6.5)            | Reference        |                 |
| 26-50%  | 228(11.5)           | 1.45(1.17-1.79) | 1.24(0.99-1.57) | 181(9.1)            | 1.34(1.06-1.68)  | 1.06(0.82-1.36) | 175(8.9)            | 1.40(1.11-1.78)  | 1.09(0.84-1.40) |
| 51-75%  | 263(13.3)           | 1.71(1.39-2.10) | 1.16(0.92-1.47) | 235(11.9)           | 1.79 (1.44-2.23) | 1.08(0.85-1.39) | 231(11.8)           | 1.92(1.53-2.41)  | 1.12(0.87-1.44) |
| 76-100% | 382(19.4)           | 2.68(2.20-3.26) | 1.24(0.99-1.60) | 358(18.2)           | 2.95(2.40-3.63)  | 1.18(0.92-1.51) | 392(20.2)           | 3.62 (2.93-4.47) | 1.42(1.10-1.82) |

Abbreviation: OR, odds ratios.

\*adjusted for: age, sex, smoking, drinking, hypertension, diabetes mellitus, low density lipoprotein, C-reactive protein, national institutes of health stroke scale, medicine at discharge (antiplatelet, Anticoagulant, lipid-lowering, hypoglycemic, antihypertensive medicines), complications (respiratory, liver, urinary and bleeding diseases).



**Suppl. Fig. 1. Subgroup analysis of death at 12m by plasma YKL-40 quartile categories**

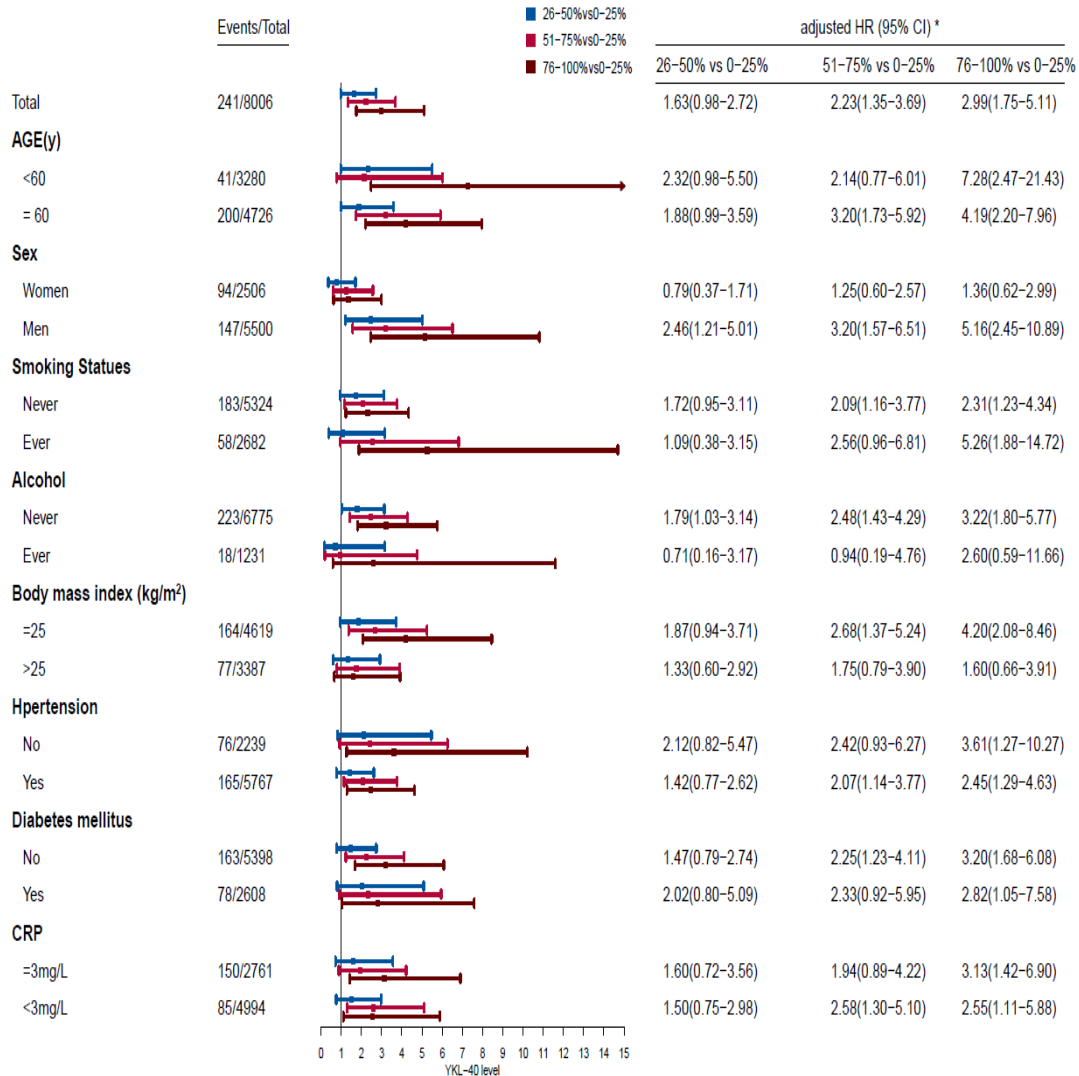

\*HR had been adjusted for potential confounders including age, sex, smoking, drinking, hypertension, DM, LDL, CRP, NIHSS, medicine at discharge (antiplatelet, anticoagulant, lipid-lowering, hypoglycemic, antihypertensive medicines), complications (respiratory, liver, urinary and bleeding diseases). Abbreviation: BMI, body mass index; CI, confidence intervals; CRP, C-reactive protein; HR, hazard ratios.

**Suppl. Fig. 2. Subgroup analysis of MRS 3-6 at 12m by plasma YKL-40 quartile categories**

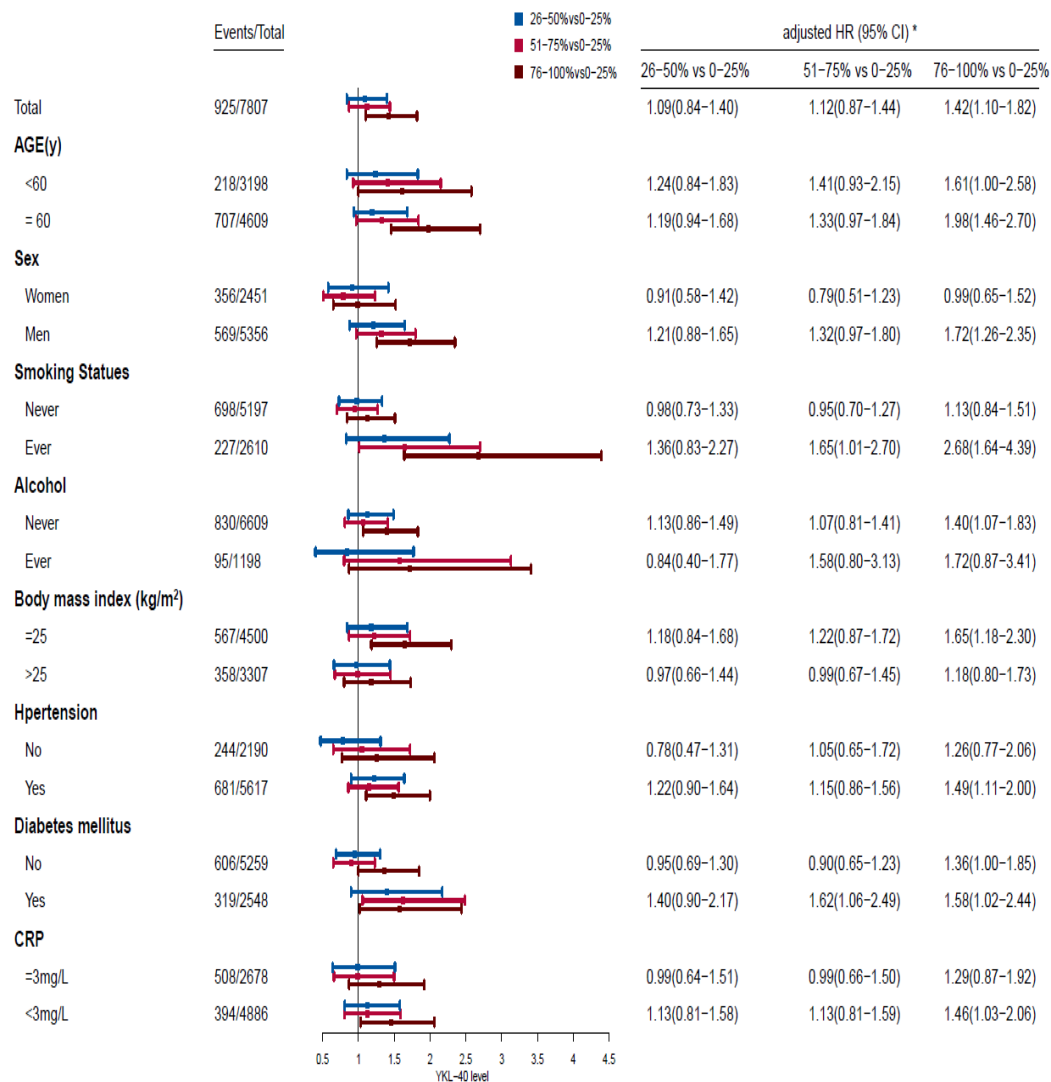

\*OR had been adjusted for potential confounders including age, sex, smoking, drinking, hypertension, DM, LDL, CRP, NIHSS, medicine at discharge (antiplatelet, anticoagulant, lipid-lowering, hypoglycemic, antihypertensive medicines), complications (respiratory, liver, urinary and bleeding diseases). Abbreviation: BMI, body mass index; CI, confidence intervals; CRP, C-reactive protein; OR, odds ratio.
